# Supplementary material for: Increasing enzyme-like activity by in situ anchoring of Ag3PO4 nanoparticles on keratin–inorganic hybrid nanoflowers
Source: Royal Society of Chemistry journal article supplement (doi:10.1039/c9nj03859k), 2019-01-01
Supplement: c9nj03859k1.pdf [file c9nj03859k1.pdf]

## Supporting Information

### Increasing enzyme-like activity by in situ anchoring of $\text{Ag}_3\text{PO}_4$ nanoparticles on keratin-inorganic hybrids nanoflower

Tiantian Cao<sup>a</sup>, Jing Zheng<sup>\*a</sup>, Jingli Xu<sup>a</sup>, Njud S. Alharbi<sup>b</sup>, Tasawar Hayat<sup>c</sup>, Min Zhang<sup>\*a</sup>

<sup>a</sup> College of Chemistry and Chemical Engineering, Shanghai University of Engineering Science, Shanghai 201620, PR China.

<sup>b</sup> Biotechnology Research Group, Department of Biological Sciences, Faculty of Science, King Abdulaziz University, Jeddah, Saudi Arabia

<sup>c</sup> Department of Mathematics, Quaid-I-Azam University, Islamabad 44000, Pakistan

#### Preparation of keratin

Feather was thoroughly washed with water by Soxhlet extraction, then degreased with acetone and subsequently regenerated keratin was prepared by reduction extraction. Keratin solution was prepared by immersing 10 g defatted feather into 100 mL solution containing 8 M urea, 0.2 M SDS and 0.5 M  $\text{Na}_2\text{S}_2\text{O}_5$ . The mixture was heated to 70°C for 60 min. Then the solution was filtered, and the dialysis was carried out using cellulose tubes with molecular weight cut-off values of 8000-14000 Da. The keratin solution was lyophilized into powder for further experiments.

#### SEM of $\text{Ag}_3\text{PO}_4$

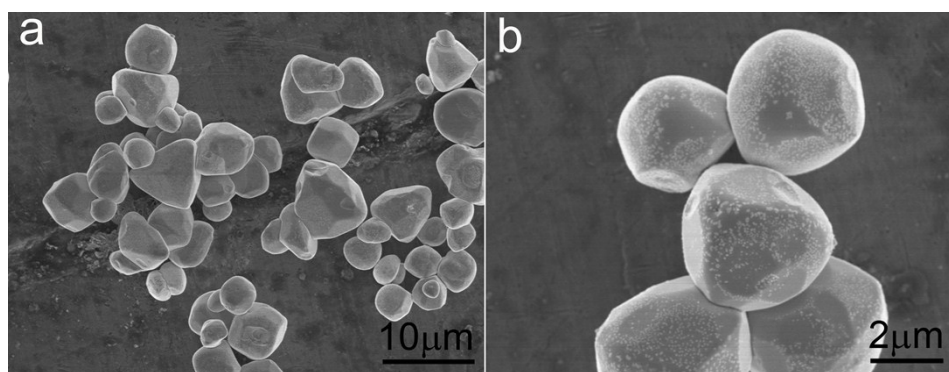

Fig.S1 (a, b) SEM images of  $\text{Ag}_3\text{PO}_4$

### SEM of keratin-NF@Ag<sub>3</sub>PO<sub>4</sub>(1:5)

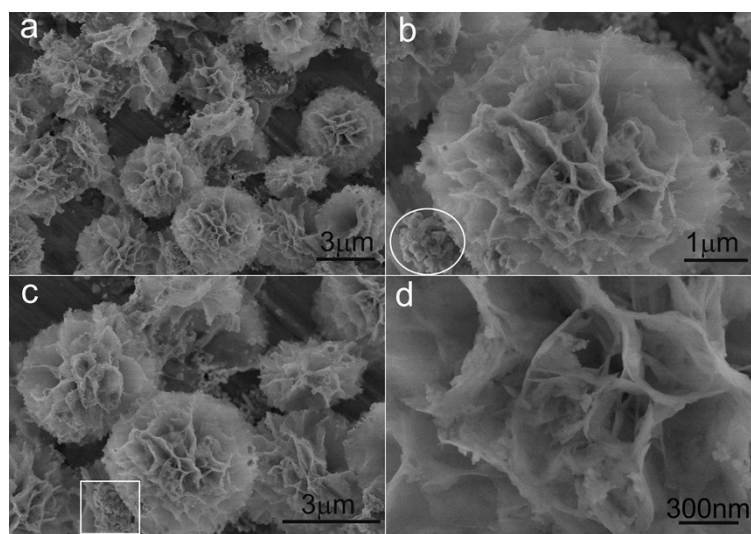

Fig.S2 (a, b, c, d) SEM images of the keratin-NF@Ag<sub>3</sub>PO<sub>4</sub>(1:5)

### EDX spectrum of keratin-NF@Ag<sub>3</sub>PO<sub>4</sub>

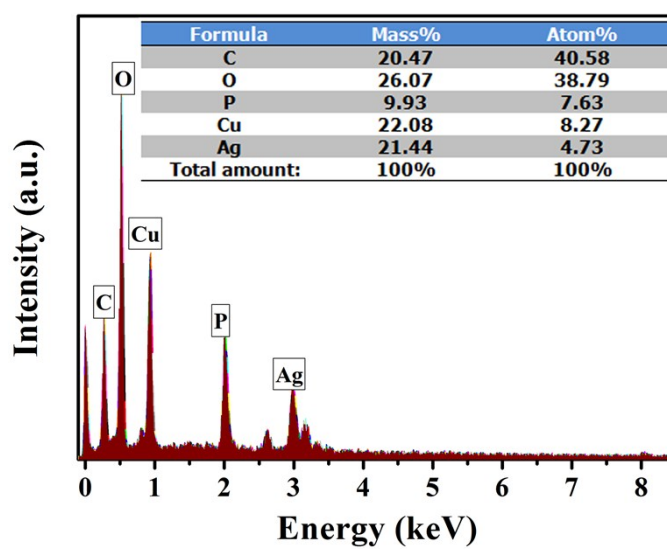

Fig.S3 EDX spectrum of the synthesized keratin-NF@Ag<sub>3</sub>PO<sub>4</sub>.

### FT-IR spectra of the obtained nanoflower

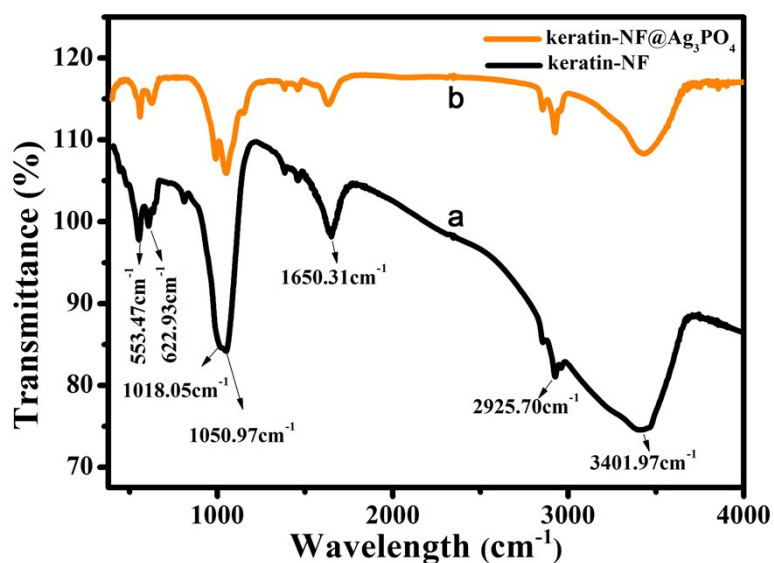

Fig.S4 FT-IR spectra of as-prepared nanoflower. (a) keratin-NF, (b) keratin-NF@Ag<sub>3</sub>PO<sub>4</sub>

### XRD patterns of the as-prepared samples

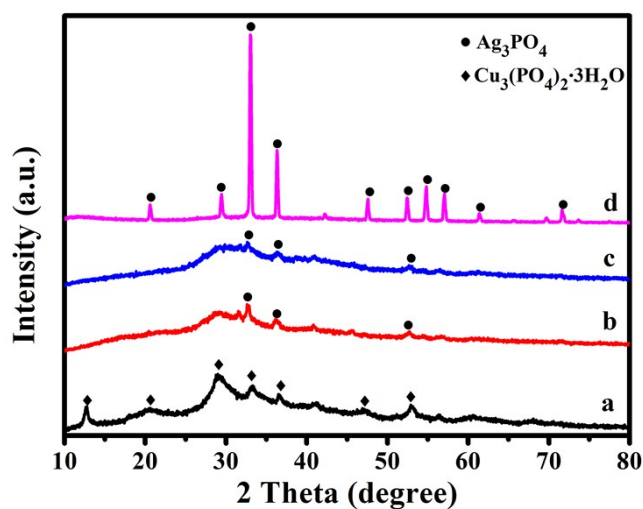

Fig.S5 XRD patterns of the as-prepared samples. (a)Cu<sub>3</sub>(PO<sub>4</sub>)<sub>2</sub>; (b)Cu<sub>3</sub>(PO<sub>4</sub>)<sub>2</sub>@Ag<sub>3</sub>PO<sub>4</sub>(1:3); (c) keratin-NF@Ag<sub>3</sub>PO<sub>4</sub>(1:3); (d) Ag<sub>3</sub>PO<sub>4</sub>.

SEM images of the hybrid nanoflower@Ag<sub>3</sub>PO<sub>4</sub>

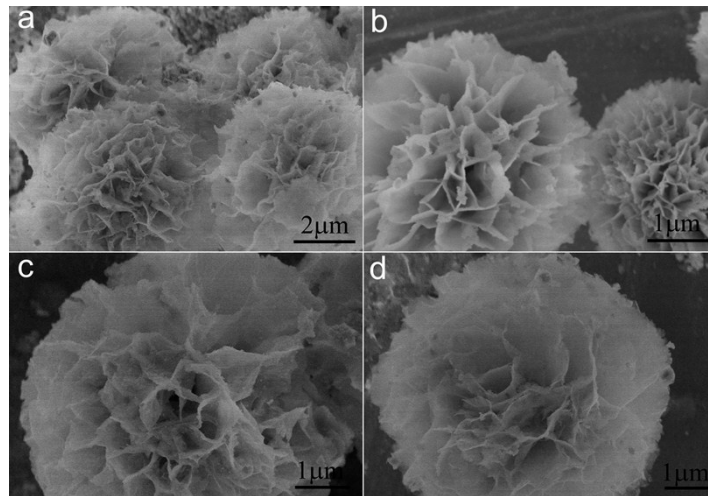

**Fig.S6** SEM images of the protein-NF@Ag<sub>3</sub>PO<sub>4</sub> (1:3). (a) lysozyme-NF@Ag<sub>3</sub>PO<sub>4</sub>, (b)BSA-NF@Ag<sub>3</sub>PO<sub>4</sub>; (c)laccase-NF@Ag<sub>3</sub>PO<sub>4</sub>; (d)trypsin-NF@ Ag<sub>3</sub>PO<sub>4</sub>.
